# Supplementary figures and images for: Lamellipodium extension and membrane ruffling require different SNARE-mediated trafficking pathways
Source: Springer Nature journal article supplement (doi:10.1186/1471-2121-11-62), 2010-08-10

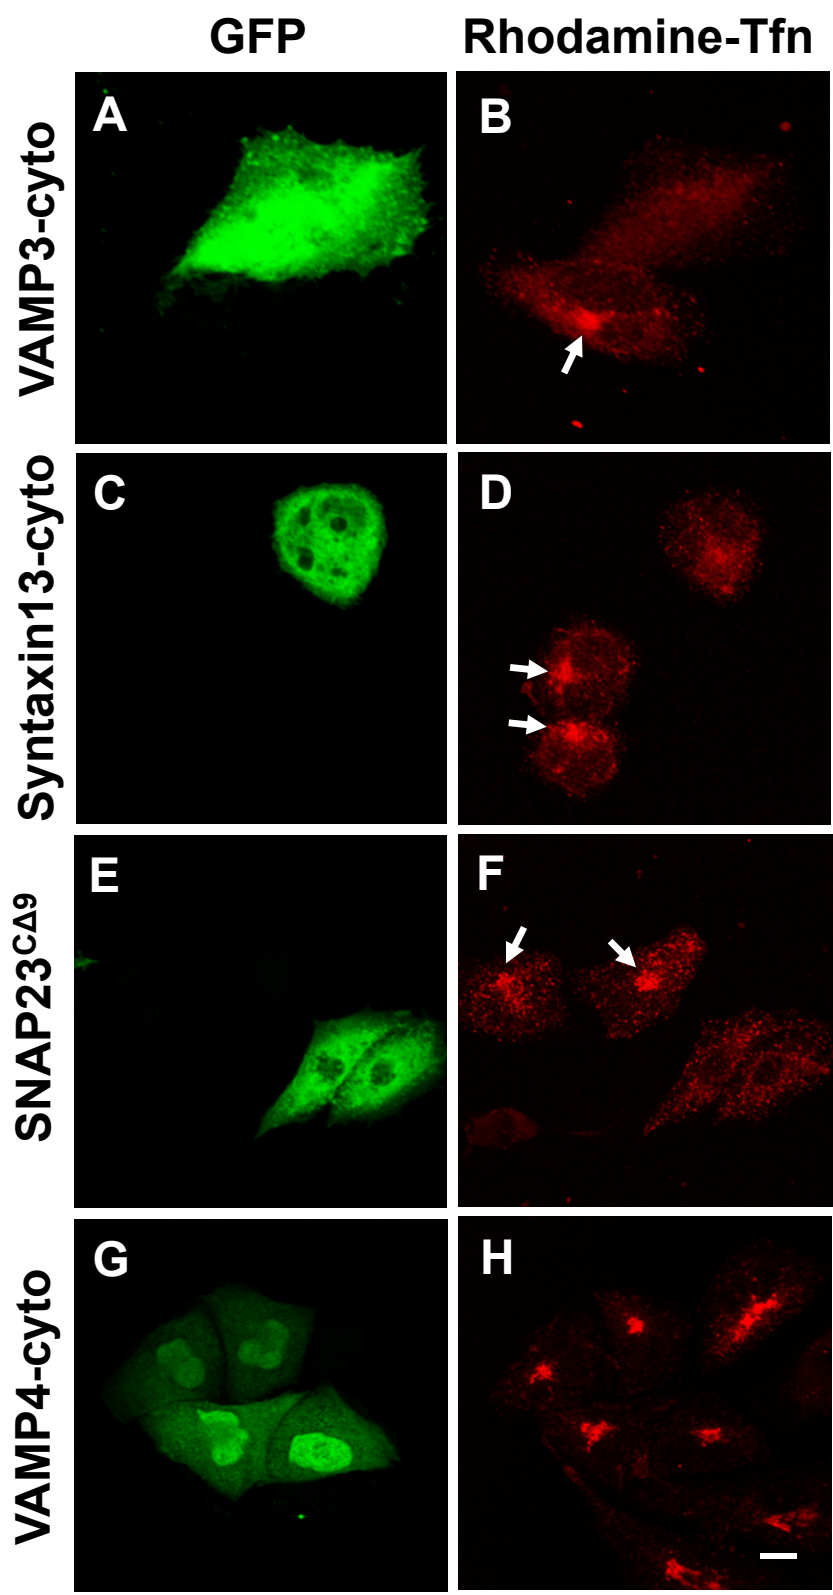

Supplement: Additional file 5 [file 1471-2121-11-62-s5.pdf]
